# Supplementary material for: Prevalence, burden, and clinical management of migraine in China, Japan, and South Korea: a comprehensive review of the literature
Source: PubMed Central journal article supplement (PMC6896325; doi:10.1186/s10194-019-1062-4), 2019-12-05
Supplement: 10194_2019_1062_MOESM1_ESM.pdf [file 10194_2019_1062_MOESM1_ESM.pdf]

**Supplementary Table 1.** Population-based studies reporting prevalence of migraine.

| Citation              | Country/<br>region   | Data collection<br>Study dates             | Migraine<br>criteria                                                                | Population<br>Total/analysed | Age (years)<br>Gender (% F)           | Prevalence                                                                                                     |
|-----------------------|----------------------|--------------------------------------------|-------------------------------------------------------------------------------------|------------------------------|---------------------------------------|----------------------------------------------------------------------------------------------------------------|
| <b>Elderly adults</b> |                      |                                            |                                                                                     |                              |                                       |                                                                                                                |
| Wang, 1997<br>(43)    | China /<br>Taiwan    | Door-to-door<br>questionnaire<br>1993–1994 | IHS                                                                                 | 2003/1533<br>RR 77%          | 65+ y<br>76 F                         | Crude: 5.2%<br>1-y: 3.0% (95% CI, 2.1%–3.9%)<br>Peak: 65–69 y 4.1% (6.1% F, 1.9% M)                            |
| Zhang, 2016<br>(28)   | China /<br>Mainland  | Door-to-door<br>questionnaire<br>2014–2015 | ICHD-III $\beta$                                                                    | 5248/5038<br>RR 96%          | 60+ y<br>NR                           | 1-y: 0.9% (95% CI, 0.6–1.1)<br>Peak: 60–69 y 1.2%                                                              |
| <b>Adults</b>         |                      |                                            |                                                                                     |                              |                                       |                                                                                                                |
| Yu 2012 (27)          | China /<br>Mainland  | Door-to-door<br>questionnaire<br>2009      | ICHD-II                                                                             | NR/5041<br>RR 94.1%          | 18–65 y<br>49.2 F                     | 1-y: 9.3% (95% CI, 8.5%–10.1%)<br>Peak <sup>a</sup> : 40–49 y 12% (16% F, 8% M)                                |
| Huang, 2013<br>(18)   | China /<br>Mainland  | Face-to-face<br>questionnaire<br>2009      | ICHD-II                                                                             | 6328/5519<br>RR 87.2%        | $\geq$ 15 y<br>56.9 F                 | Crude: 10.5%<br>Standardised: 9.6%<br>Peak: 40–49 y 11.3% (14.5% F, 6.0% M)                                    |
| Luo, 2014 (23)        | China /<br>Mainland  | Face-to-face<br>questionnaire<br>2009      | ICHD-II                                                                             | 570/554<br>RR 97.2%          | Mean (2 sites):<br>40–42 y<br>42–47 F | 1-y per region:<br>8.3% (95% CI, 6.0%–11.0%)<br>14.3% (95% CI, 9.0%–19.0%)<br>Peak: NR                         |
| Wang, 2016<br>(25)    | China /<br>Mainland  | Door-to-door<br>questionnaire<br>2013      | ID-Migraine<br>Screener –<br>Chinese version                                        | 2588/1143<br>RR 44.2%        | Mean 50.7 y<br>61.9 F                 | Crude: 8.9% (not ICHD-III confirmed)<br>Peak: 35–44 y 12% <sup>a</sup> (17.4% F, <5% M <sup>a</sup> )          |
| Lin, 2018 (21)        | China /<br>Mainland  | Face-to-face<br>questionnaire<br>2014–2015 | ICHD-III                                                                            | 9134/7860<br>RR 86.1%        | $\geq$ 15 y<br>52.3 F                 | Crude: 9.1%<br>Peak: 40–49 y 11.0%                                                                             |
| Wong, 1995<br>(30)    | China /<br>Hong Kong | Telephone<br>questionnaire<br>1998         | IHS                                                                                 | 3156/1436<br>RR 45.5%        | $\geq$ 15 y<br>55.3 F                 | Crude: 4.7% (95% CI, 3.7%–6.0%)<br>Peak: NR                                                                    |
| Wang, 2000<br>(41)    | China /<br>Taiwan    | Face-to-face<br>questionnaire<br>1997–1998 | IHS migraine<br>and modified<br>migraine (IHS +<br>attacks of 2-to<br>4-h duration) | 4434/3377<br>RR 76.2%        | $\geq$ 15 y<br>46.6 F                 | Crude<br>IHS migraine, 7.7% (95% CI, 6.8%–8.6%)<br>Modified migraine, 2.0%<br>Crude, 9.7% (95% CI, 8.7%–10.7%) |

| Citation                        | Country/<br>region | Data collection<br>Study dates              | Migraine<br>criteria                                                      | Population<br>Total/analysed                                      | Age (years)<br>Gender (% F) | Prevalence                                                                                                 |
|---------------------------------|--------------------|---------------------------------------------|---------------------------------------------------------------------------|-------------------------------------------------------------------|-----------------------------|------------------------------------------------------------------------------------------------------------|
|                                 |                    |                                             |                                                                           |                                                                   |                             | Peak: 30–34 y 13.5% (35–39 y 16.0% F, 25–29 y 8.3% M)                                                      |
| Takeshima, 2004 (51)            | Japan              | Door-to-door questionnaire 1999             | IHS                                                                       | 5758/4795<br>RR 83.4%                                             | ≥20 y<br>54.6 F             | 1-y: 6.0% (95% CI, 5.4%–6.6%)<br>Peak MOA: 40–49 y 17.6% F; 30–39 y 2.8% M                                 |
| Sakai, 1997 (49)                | Japan              | Telephone survey, postal questionnaire NR   | IHS migraine and modified migraine (IHS + attacks of 2- to 4-h duration)  | 4029/1029<br>RR 64.4%                                             | ≥15 y<br>66.8 F             | Crude IHS migraine 6.0%<br>Crude Modified migraine 8.4%<br>Peak <sup>a</sup> : 30–39 y 20% F, 20–29 y 7% M |
| Roh, 1998 (57)                  | South Korea        | Telephone survey, postal questionnaire 1996 | IHS (MOA, MWA, and migrainous disorder not fulfilling the criteria above) | 2500/1701<br>RR 68.3%<br>telephone;<br>804/380<br>RR 47.3% postal | ≥15 y<br>50.7 F             | Crude all codes: 22.3%<br>MWA: 10.4%, MOA: 11.0%<br>Peak: 15–19 y 34.7% F, 28.5% M                         |
| Kim, 2012 and Chu, 2013 (53,54) | South Korea        | Face-to-face questionnaire 2009             | ICHD-II                                                                   | 4054/1507<br>RR 37.2%                                             | ≥19 y<br>NR                 | 1-y: 6.1%<br>Peak <sup>a</sup> : 40–49 y 7% (11% F, 4% M)                                                  |
| <b>Young adults</b>             |                    |                                             |                                                                           |                                                                   |                             |                                                                                                            |
| Gu, 2018 (17)                   | China / Mainland   | Self-reported questionnaire 2016            | ID-Migraine Screener – Chinese version                                    | 1020/986<br>RR 96.7%                                              | Mean 22.4 y<br>63 F         | 1-y: 7.9% (95% CI, 6.2%–9.6%)<br>Peak: NR                                                                  |
| Wang, 2015 (24)                 | China / Mainland   | Self-reported questionnaire 2012            | ID-Migraine Screener – Chinese version                                    | 5129/4406<br>RR 85.9%                                             | Mean 21.5 y<br>67.6 F       | Crude 9.0% (95% CI, 8.2%–9.8%)<br>Peak: NR                                                                 |
| <b>Children/adolescents</b>     |                    |                                             |                                                                           |                                                                   |                             |                                                                                                            |
| Jin, 2013 (19)                  | China / Mainland   | School-based questionnaire NR               | ICHD-II-revised                                                           | 4823/4812<br>RR 99.8%                                             | 7–15 y<br>46.9 F            | Crude 4.3%<br>Peak: NR                                                                                     |
| Kong, 2001 (29)                 | China / Hong Kong  | School-based questionnaire 1999             | IHS (migraine and migraine excluding ≥5 attacks)                          | 2156/2120<br>RR 98.3%                                             | 5–16 y<br>47.4 F            | Crude 1.2% (95% CI, 0.7–1.6)<br>Peak: 12–13 y 5.5%                                                         |

| Citation           | Country/<br>region | Data collection<br>Study dates             | Migraine<br>criteria                                  | Population<br>Total/analysed | Age (years)<br>Gender (% F)          | Prevalence                                                                                                                                                    |
|--------------------|--------------------|--------------------------------------------|-------------------------------------------------------|------------------------------|--------------------------------------|---------------------------------------------------------------------------------------------------------------------------------------------------------------|
| Lu, 2000 (34)      | China /<br>Taiwan  | School-based<br>questionnaire<br>1998-1999 | IHS (MOA<br>excluding ≥5<br>attacks)                  | 4436/4064<br>RR 91.6%        | 13–15 y<br>51.2 F                    | Crude:<br>13 y 4.8% (95% CI, 3.6%–6.0%)<br>14 y 7.1% (95% CI, 5.7%–8.5%)<br>Peak: 15 y 8.4% (95% CI, 7.0%–9.8%)                                               |
| Wang, 2005<br>(38) | China /<br>Taiwan  | Questionnaire<br>interviews<br>1999-2001   | IHS (MOA<br>excluding ≥5<br>attacks)                  | 23,433/13,426<br>RR 97%–99%  | 13–15 y<br>47–48 F                   | 1-y:<br>1999 5.2% (95% CI, 4.7%–5.7%)<br>2000 6.8% (95% CI, 6.3%–7.4%)<br>2001 7.4% (95% CI, 6.8%–8.0%)<br>Peak 2001: 15 y (Grade 9): 8.5% (11% F,<br>6.3% M) |
| Wang, 2009<br>(39) | China /<br>Taiwan  | School-based<br>questionnaire<br>2005      | ICHD-II (MOA,<br>MWA, probable)                       | 4259/3963<br>RR 93.0%        | 13–15 y<br>48.5 F                    | Crude<br>All 23.4%, MWA 3.5%, MOA 8.7%,<br>Probable 11.2%<br>Peak: NR                                                                                         |
| Goto, 2017<br>(46) | Japan              | School-based<br>questionnaire<br>2012      | ICHD-IIIβ<br>(unilateral aura<br>was not<br>included) | 3404/3285<br>RR 96.5%        | 6–12 y: 50.9 F<br>12–15 y: 47.5<br>F | Crude:<br>6–12 y: 3.5% (n=73)<br>12–15 y: 5.0% (n=58)<br>Peak: NR                                                                                             |
| Ando, 2007<br>(45) | Japan              | School-based<br>questionnaire<br>2004      | ICHD-II for<br>children                               | 6869/6472<br>RR 94.2%        | 12–15 y<br>48.3 F                    | Crude: 4.8% (313/6470)<br>Peak: NR                                                                                                                            |
| Rho, 2012 (56)     | South<br>Korea     | School-based<br>questionnaire<br>2009      | IHS for children                                      | 5360/5039<br>RR 94.0%        | 6–18 y<br>52.3 F                     | 1-y prevalence 8.7%<br>6–12 y 4.9%<br>13–15 y 9.0% <sup>a</sup><br>Peak: 16–18 y 14.2%                                                                        |

CI, confidence interval; F, female; ICHD-II/IIIβ, International Classification of Headache Disorders; IHS, International Headache Society; M, male; MOA, migraine without aura; MWA, migraine with aura; NR, not reported; OR, odds ratio; RR, response rate.

<sup>a</sup> Estimated from graph in publication.
